# Supplementary material for: Pattern separation of spiketrains in hippocampal neurons
Source: PubMed Central journal article supplement (PMC6437159; doi:10.1038/s41598-019-41503-8), 2019-03-27
Supplement: 41598_2019_41503_MOESM1_ESM.pdf [file 41598_2019_41503_MOESM1_ESM.pdf]

## Supplements

Tables and supplementary figures for "Pattern separation of spiketrains in hippocampal neurons"  
 Authors: A.D. Madar, L.A. Ewell, M.V. Jones.

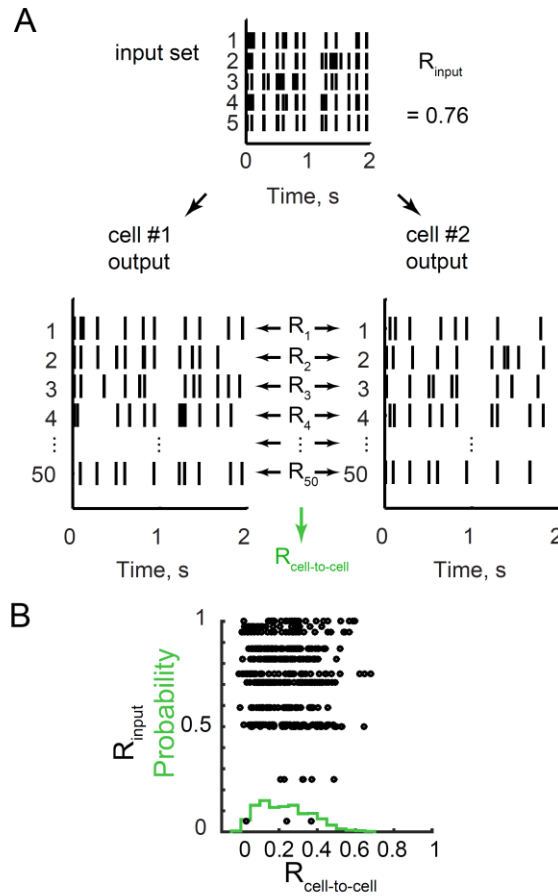

**Figure S1. Different granule cells process identical inputs differently.**

(A) The similarity between pairs of spiketrains coming from two different output sets but associated to the same input set and with the same sweep number is assessed with the Pearson's correlation coefficient ( $\tau_w = 10$  ms). The fifty resulting coefficients are then averaged to give  $R_{cell-to-cell}$ , a single number measuring the overall similarity of all output spiketrains between two output sets. (B) Probability distribution of  $R_{cell-to-cell}$  (green histogram) across all GC recordings (all combinations of pairs of GC output sets from the same input set were compared). The distribution of  $R_{cell-to-cell}$  (black circles) is not dependent on  $R_{input}$ .

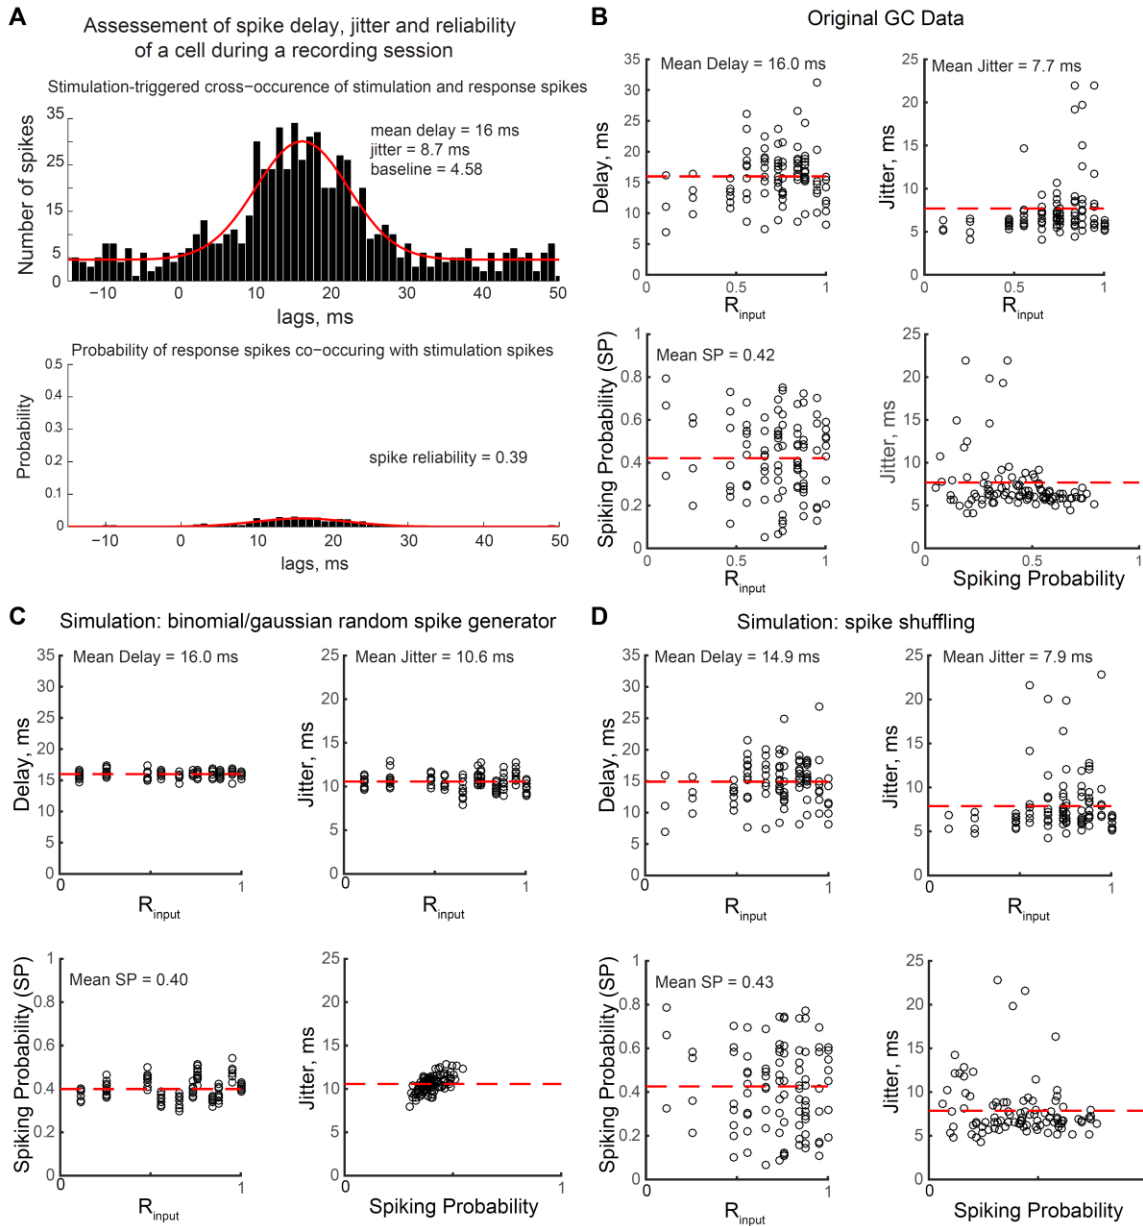

15  
16 **Figure S2 related to Figure 7. Spike delay, jitter and reliability distributions for real data,**  
17 **simulations and shuffled data**

18 (A) Cross-occurrence method to measure spike delay, jitter and spiking reliability of a neuron during a  
19 given recording session. *Top*: Example histogram of output spikes occurring after input spikes, fitted (red  
20 curve) with a Gaussian distribution  $N(\mu, \sigma, \text{baseline})$ , where  $\mu$  is the mean delay and  $\sigma$  is the jitter of this  
21 delay. Lag 0 ms corresponds to the input spike time. In this example, output spikes are generated on  
22 average 16 ms after a stimulation impulse (delay) with a jitter ( $\sigma$ ) of 8.7 ms. *Bottom*: the baseline is  
23 subtracted and the histogram divided by the number of input spikes during the recording session. This  
24 gives the distribution of the probability of spiking after an input spike, the sum of probabilities defining  
25 the spiking probability (SP) of the cell during the recording session. Here the neuron fires 39 % of the  
26 time after an input spike.

27 (B-D) Delay, jitter and spiking probability (SP) distributions as a function of input sets, for (B) the  
28 original GC recordings, (C) the simulations of binomially random spiking with Gaussian delay ( $n = 110$ )  
29 and (D) one spike shuffling dataset ( $n = 102$ ). Dashed horizontal red lines are means.

**A** GC original recordings ( $\tau_w=10\text{ms}$ )

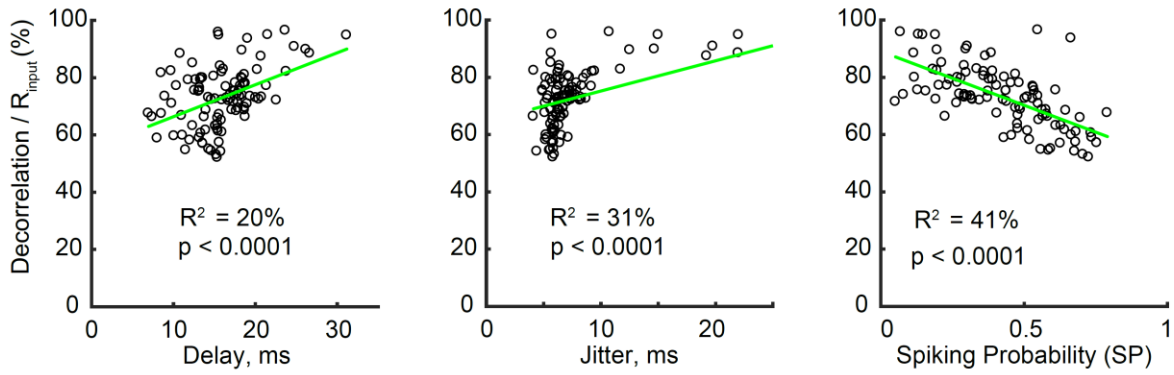

**B** Spike shuffling ( $\tau_w=10\text{ms}$ )

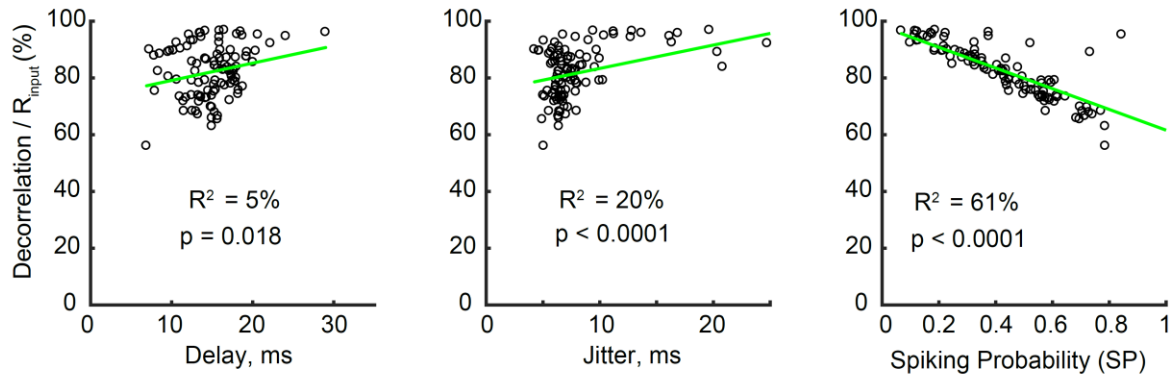

**C** FS interneurons recordings ( $\tau_w=10\text{ms}$ )

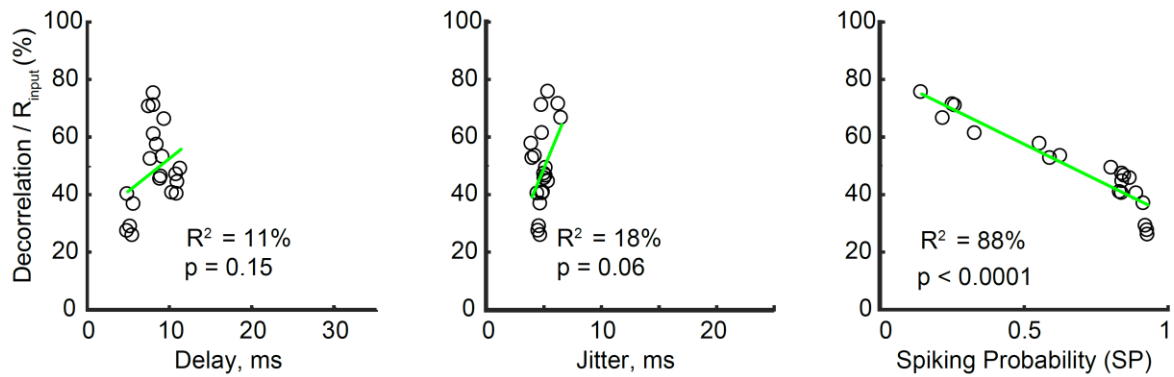

**D**

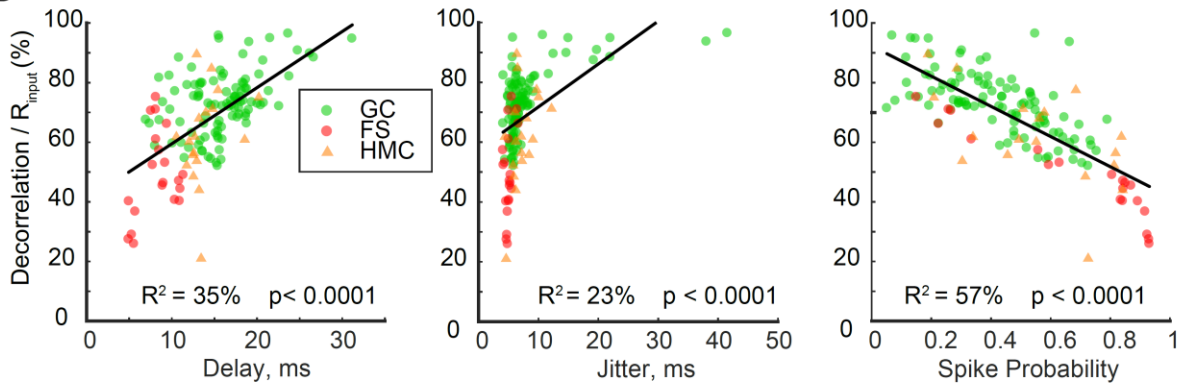

31 **Figure S3 related to Figure 7. Spike-wise neural noise characteristics are not good predictors of**  
32 **spiketrain decorrelation by single GCs.**

33 Plots of the normalized decorrelation, i.e.  $(R_{\text{input}} - R_{\text{output}}) / R_{\text{input}}$ , of each recording set ( $\tau_w = 10$  ms) : 102  
34 for GC original and shuffled recordings (**A-B**), 20 for FS (**C**), and for GC, FS and HMC pooled together  
35 (**D**) as a function of spike-wise noise characteristics (spike delay, jitter and probability). Solid green lines  
36 are the best linear fit, with  $R^2$  and p-values noted in each panel. These plots illustrate **Table S2**. Note that  
37 decorrelation is poorly explained (low  $R^2$ ) by either the spike delay or its jitter in all cell-types. In  
38 contrast, the spiking probability (SP) is a good predictor of decorrelation in shuffled GC recordings (n =  
39 102 recordings entirely dominated by spike-wise noise. See Figure S2) and even more so in FS recordings  
40 (for FS, SP was computed from nbFS data. See Figure S7). This suggests that a low SP can be a potent  
41 mechanism for decorrelation, and that FS show different levels of decorrelation than GCs partly because  
42 they are more reliable. However, the regression line for FS is lower than for GCs (even FS with low SP  
43 show less decorrelation than GCs with similar SP), and SP is only an average predictor of decorrelation  
44 for GCs, thus confirming that temporal pattern separation in single GCs cannot be the result of simple  
45 neural noise.  
46

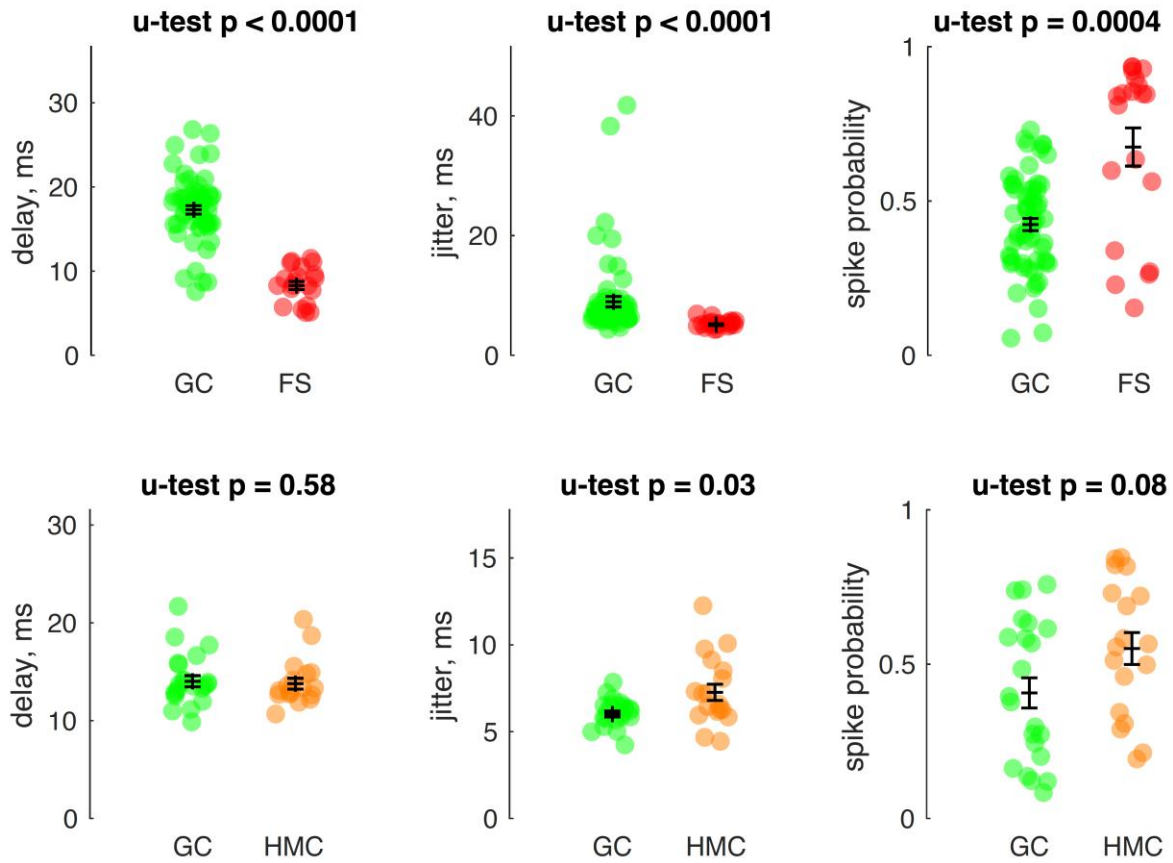

47  
 48 **Figure S4 related to Figure 7. Spike-wise noise characteristics of granule cells are different than**  
 49 **those of DG interneurons.**

50 Mean  $\pm$  SEM (bars) and individual recordings (dots). Spike delay, jitter and spiking probability (SP) for  
 51 FS interneurons compared to GC recordings associated with the same input sets than FS (*top*) (20 FS  
 52 recordings, 61 GC recordings, see Figure 3A) and HMC interneurons compared to a different set of GC  
 53 recordings associated with the same input sets than HMC (*bottom*) (18 HMC recordings, 22 GC  
 54 recordings, see Figure 3B). A U-test was applied to each pair of comparison, showing that FS are much  
 55 faster and less noisy than GCs, whereas HMC are similar to GCs (slightly larger jitter, but slightly higher  
 56 SP).  
 57

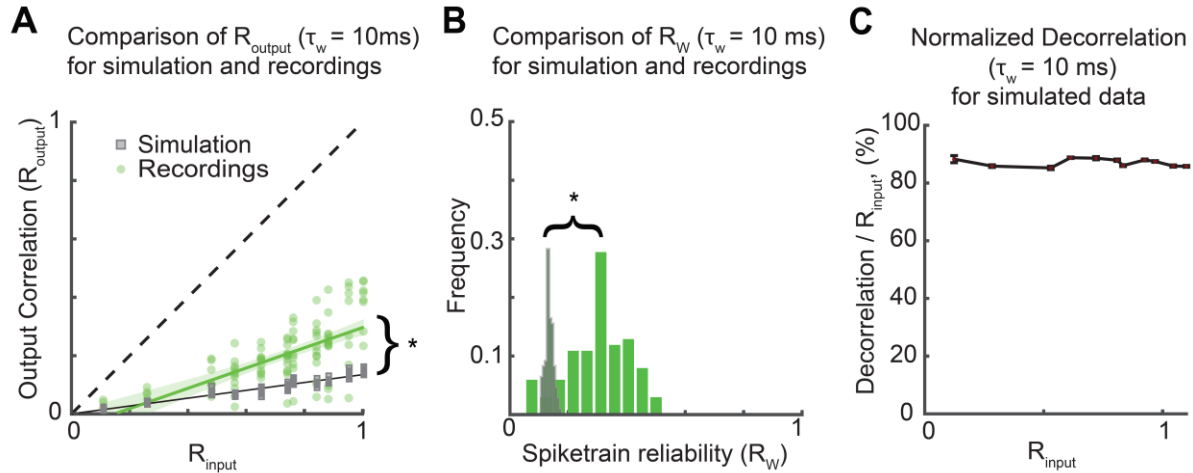

58  
 59 **Figure S5 related to Figure 7.  $R_{\text{output}}$  and spiketrain reliability are lower for a random spike**  
 60 **generator than for GCs.**

61 A Binomial/Gaussian random spike generator with parameters based on the mean spike-wise neural noise  
 62 measured in GCs leads to more decorrelation but less spiketrain reliability than in GCs.

63 (A)  $R_{\text{output}}$  distribution at  $\tau_w = 10\text{ms}$ , for simulated and GC recordings. (ANCOVA:  $p < 0.0001$ ). Shaded  
 64 areas (green and grey) represent the 95% CI of the regressions.

65 (B)  $R_w$  distributions are significantly different (unpaired T-test correcting for unequal variances:  $p <$   
 66  $0.0001$ ,  $\langle R_w \rangle_{\text{simul}} = 0.14$ ).

67 (C) Like in the original data (Fig 2E), the average normalized decorrelation ( $(R_{\text{input}} - R_{\text{output}}) / R_{\text{input}}$ ) seems  
 68 invariant. Bars are SEM.

69 (A-B) Asterisks:  $p < 0.05$ .  
 70

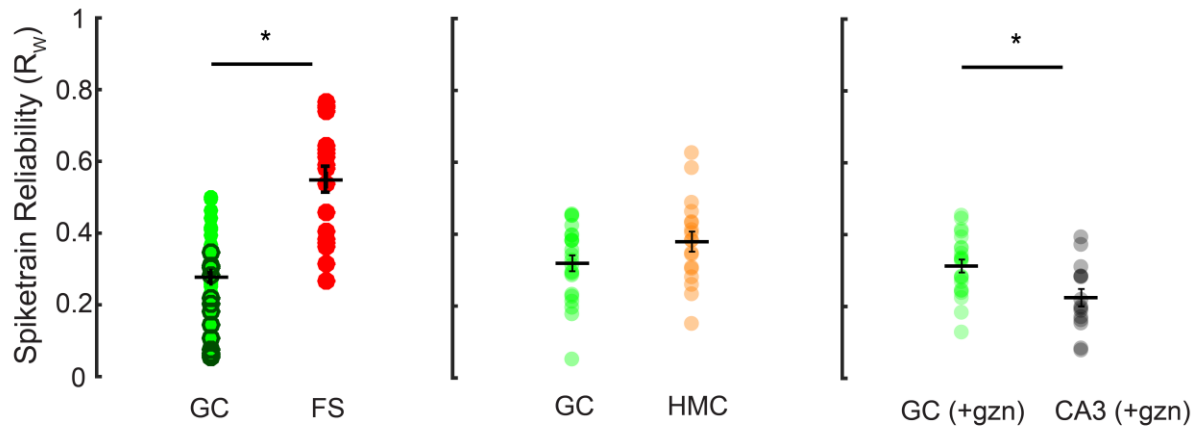

71  
72  
73  
74  
75  
76  
77  
78

**Figure S6 related to Figure 8A. Spiketrain reliability in different hippocampal celltypes**

FS have a higher  $R_w$  than GCs ( $n = 20$  vs  $61$  recording sets, unpaired T-test:  $p < 0.0001$ ). Note that when comparing only the simultaneous FS and GC recordings (dark green), we found a similarly significant difference. HMCs  $R_w$  are not significantly higher than in GCs ( $n = 18$  vs  $22$  recording sets, unpaired T-test:  $p = 0.0963$ ). Under partial block of inhibition, CA3 pyramidal cells have a lower  $R_w$  than GCs ( $n = 15$  vs  $22$  recording sets, unpaired T-test:  $p = 0.0052$ ). Asterisks:  $p < 0.05$

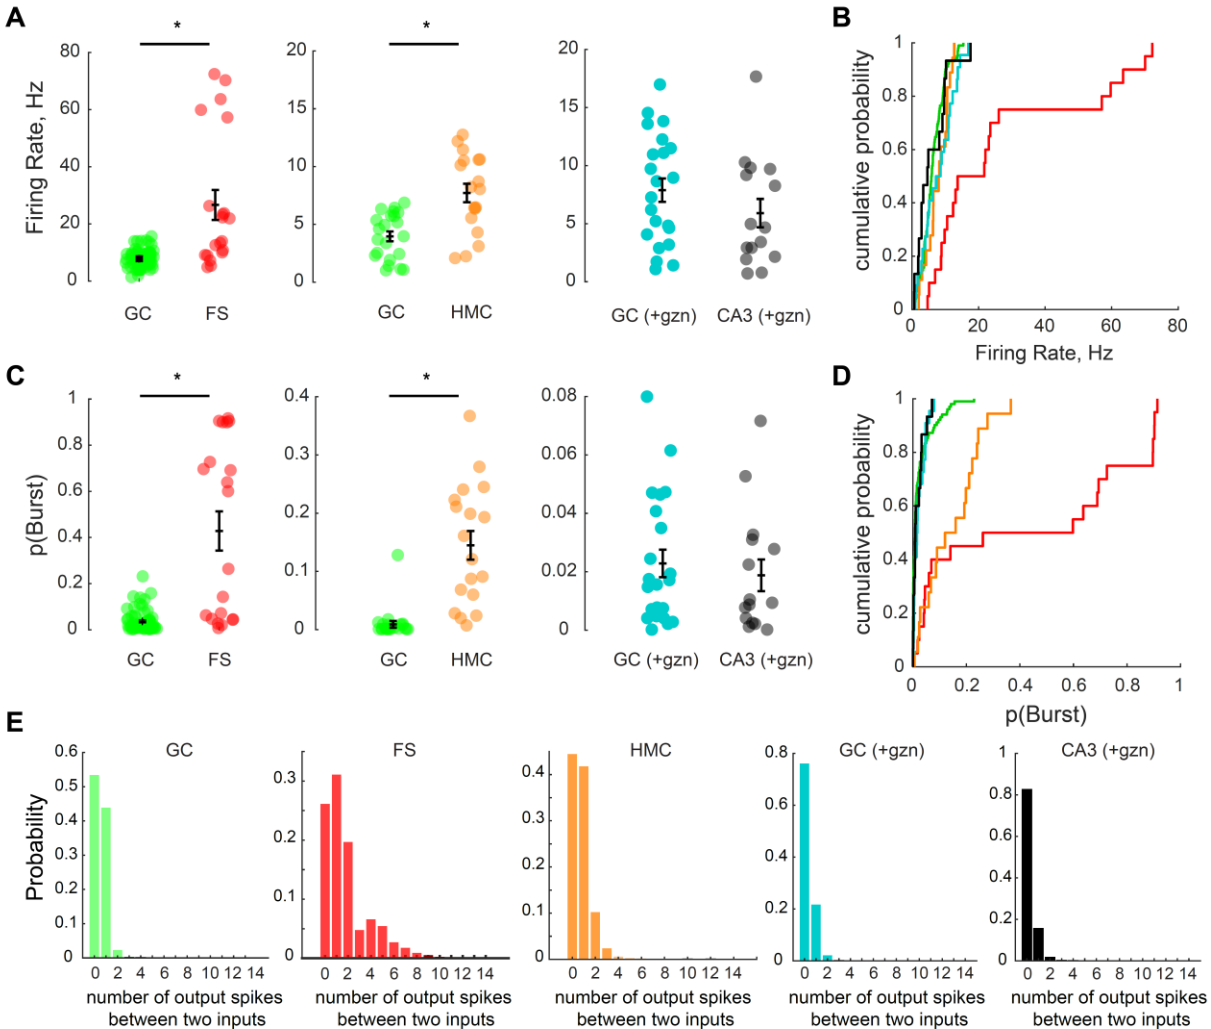

79  
80 **Figure S7 related to Figure 3. DG interneurons fire bursts and have a higher firing rate than GCs**  
81 **(A-B)** Comparison of the firing rate in all celltypes and conditions. **(A)** For each comparison the GC  
82 dataset is different and matched to the non-GC dataset, as in Figure 3-4. FS and HMC have a higher firing  
83 rate than their GC control (U-test:  $p < 0.0001$  and  $p = 0.0005$  respectively) whereas CA3 and GC  
84 recordings under gabazine and 30 Hz input trains do not differ (U-test:  $p = 0.18$ ).  
85 **(B)** Cumulative distributions of the firing rate for all recordings of all celltypes ( $n = 102$  GC, 20 FS, 18  
86 HMC, 15 CA3+gzn, 22 GC+gzn).  
87 **(C-D)** Same as A-B for the probability of bursting in a recording. Bursting was defined as the occurrence  
88 of at least two action potentials between two input pulses. **(C)** FS and HMC have a higher propensity to  
89 fire bursts than their GC control (U-test:  $p < 0.0001$ ) whereas CA3 pyramidal cells and their GC control  
90 do not differ (U-test:  $p = 0.74$ ).  
91 **(E)** The distribution of the number of spikes between two input pulses, for all celltypes, show that FS are  
92 the only neurons that consistently fire large bursts. Note that GCs almost never fire more than twice, and  
93 when they do it generally corresponds to two preceding input pulses occurring close to each other (the  
94 first spike being in reality associated to a different input than the next spike).  
95



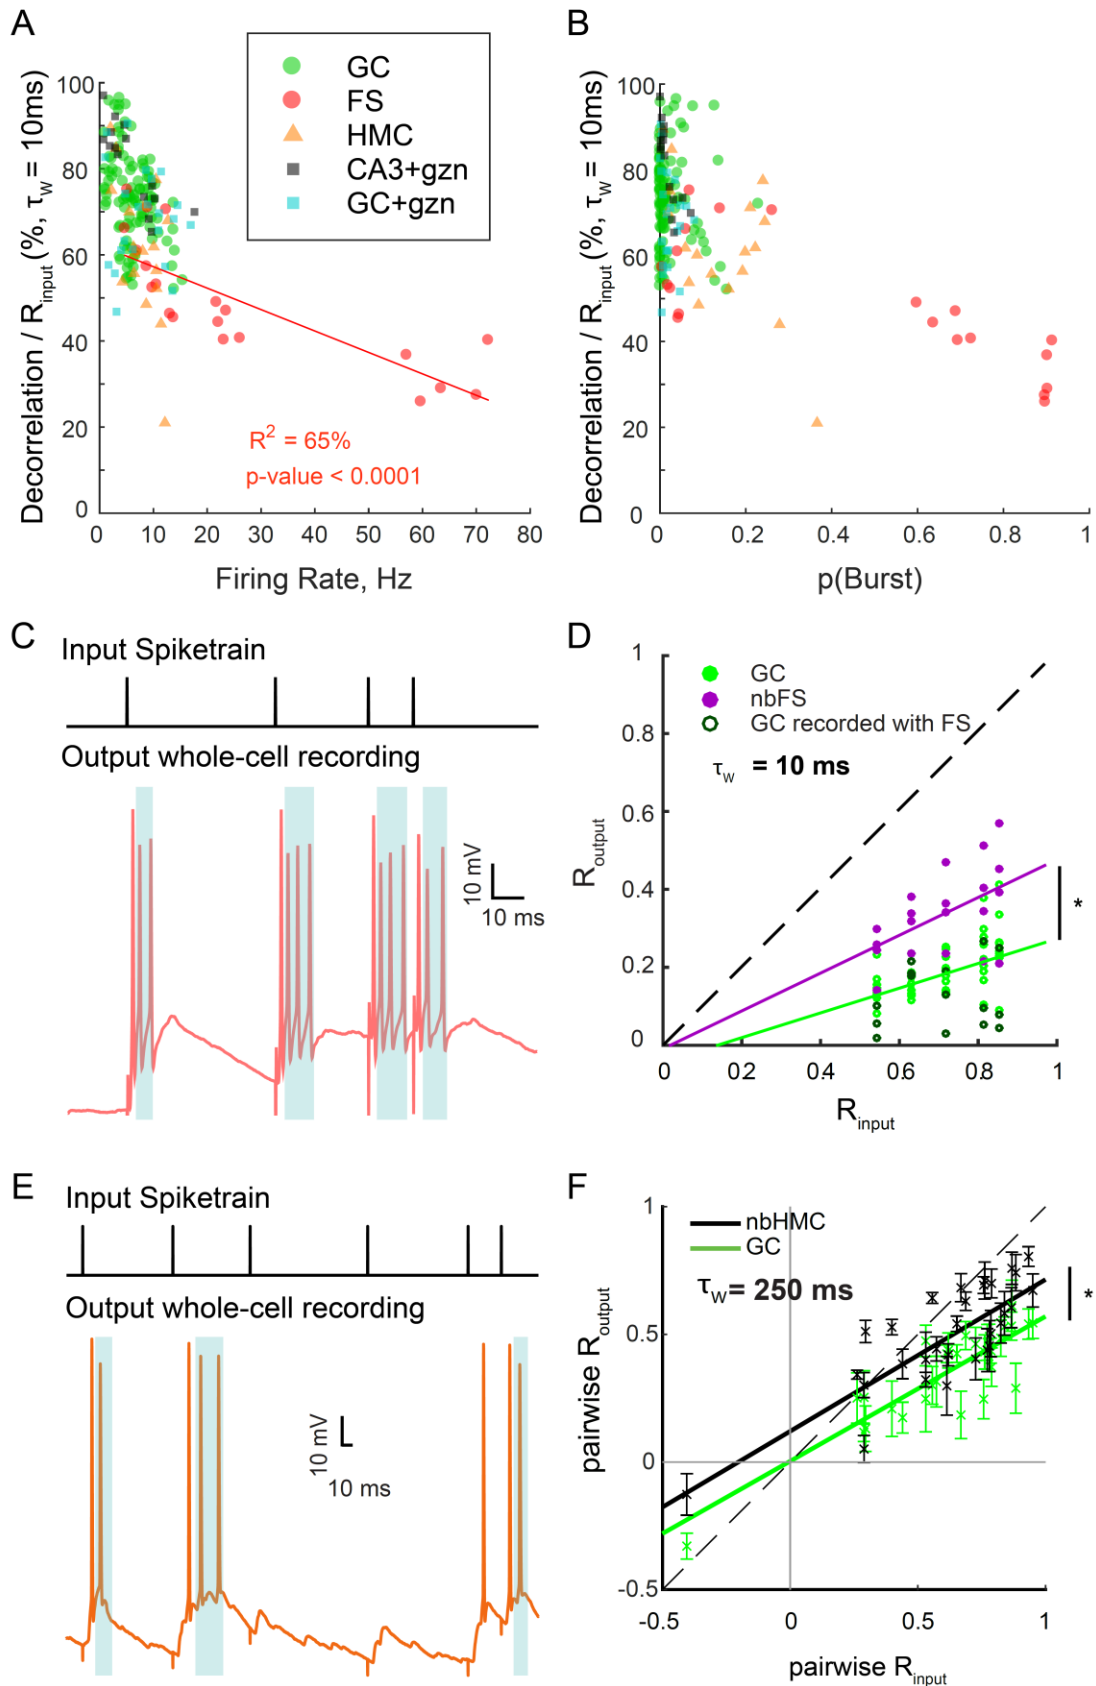

97 **Figure S8 related to Figure 3 and 5. Differences in pattern separation between GC and DG**  
98 **interneurons are not solely due to different firing rates and bursting behaviors.**  
99 (A) The relationship between the firing rate and decorrelation levels in all recordings of all celltypes. In  
100 contrast to GCs, for FS neurons there is a strong correlation between the firing rate of a recording set and  
101 the associated normalized decorrelation. See **Table S3** for more details.  
102 (B) The relationship between the probability of bursting (see Figure S7) and the decorrelation levels in all  
103 recordings of all celltypes is less clear, but cells bursting more than 30% of the time have the lowest  
104 decorrelation levels.  
105 (C) Example of bursts in a FS recording (*bottom*) in response to input spikes (*top*). To assess the effect of  
106 bursting on  $R_{\text{output}}$ , we truncated each recorded spiketrain from FS neurons to keep only the first output  
107 spike between two input spikes, thus removing any burst without altering the SP of the cell. The blue  
108 shaded areas highlight the spikes that were removed. The resulting truncated dataset was termed "nbFS"  
109 for "non-burst FS".  
110 (D)  $R_{\text{output}}$  versus  $R_{\text{input}}$  for nbFS and GC at  $\tau_w = 10\text{ms}$  (to compare to Figure 3A4). Both distributions are  
111 still significantly different, suggesting the bursting behavior of FS is not sufficient to explain the  
112 difference in pattern separation: ANCOVA:  $p < 0.0001$ .  
113 (E) Bursts in HMC recordings were truncated to produce an "nbHMC" dataset.  
114 (F) Pairwise analysis on nbHMC and GC recordings at  $\tau_w = 250\text{ms}$  show that the distributions are still  
115 different between the two celltypes (to compare to Figure 5D): ANCOVA:  $p < 0.0001$ . Under this  
116 analysis, nbHMCs and GCs are also significantly different at lower timescales ( $\tau_w = 100, 50$  and  $10\text{ms}$ )  
117 but with a lower effect size as  $\tau_w$  decreases (not shown).  
118

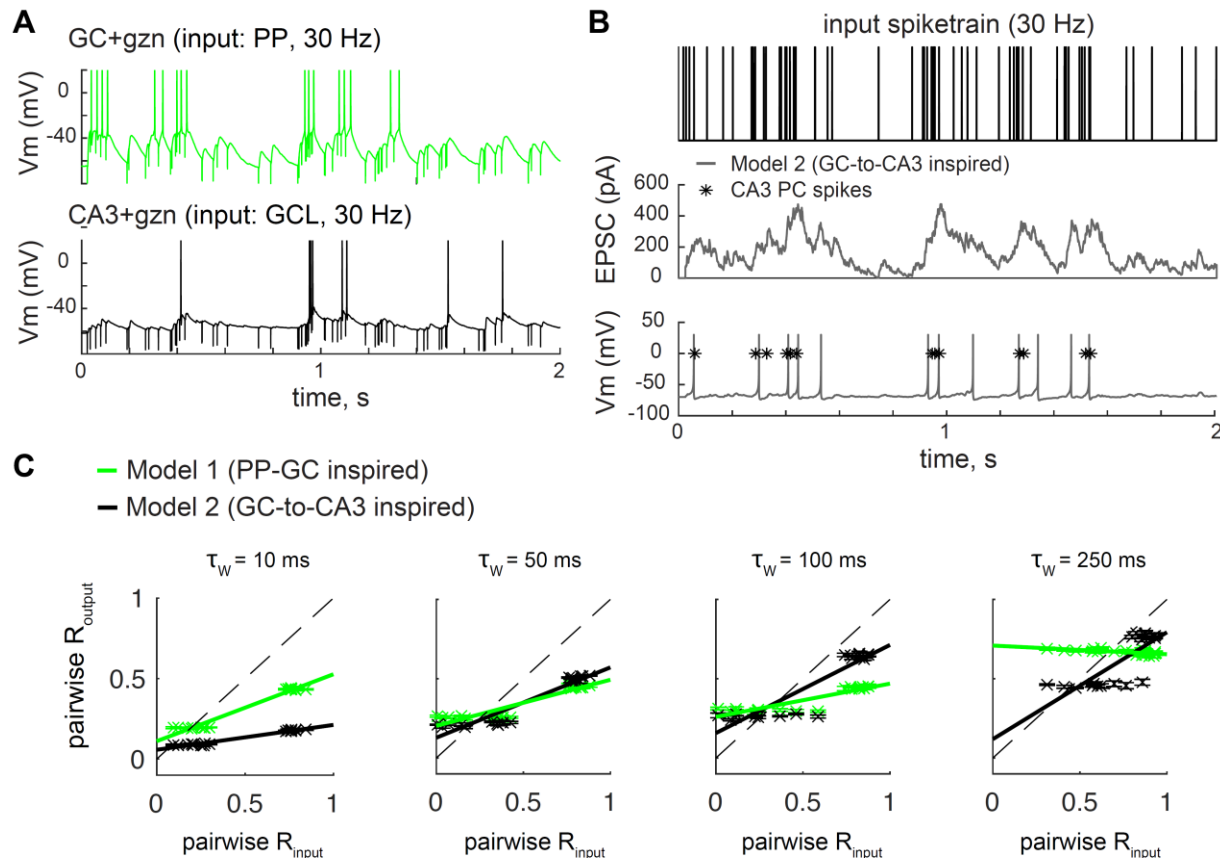

119 **Figure S9 related to Figure 5 and 9. Short-term synaptic dynamics differences can drive differences**  
 120 **in terms of temporal pattern separation.**  
 121

122 (A) Examples of current-clamp recordings in one GC and one CA3 PC, under partial block of inhibition,  
 123 in response to a 30 Hz input train (input pulses are noticeable as downward artefacts). EPSPs visually  
 124 appear quite different between GCs and CA3 PCs, with clear facilitation in CA3 PCs, which leads them to  
 125 spike mostly during periods of high input frequencies.

126 (B-C) We designed two models of spiking neurons only differing by a few synaptic parameters. Model 1  
 127 is the same as the model presented in Figure 9, with depressing EPSC dynamics, except that the inhibition  
 128 constant was decreased to match FR observed in real GC+gzn recordings. Model 2 was inspired by GC-  
 129 to-CA3 mossy fiber synapses that exhibit low initial probability of release and short-term facilitation, and  
 130 the inhibition constant was set so to match the mean FR of real CA3+gzn recordings (~7Hz). Model 1 and  
 131 2 were thus designed to have different synaptic dynamics but yield similar FR. Spiking responses to the  
 132 pattern separation protocols used on real CA3 PCs and their GC controls (30 Hz input trains:  $R_{input} = 0.21$   
 133 and 0.76, shown in Figure 4) were then simulated ( $n = 5$  simulated output sets for each model and each  
 134  $R_{input}$ ).

135 (B) Example of current and voltage responses of model 2 to a 30 Hz input train. Asterisks correspond to  
 136 spike times of a single sweep from a CA3 PC recording (different than in A).

137 (C) Pairwise correlation analysis, as in Figure 5, shows that the two models yield visually obvious  
 138 differences in terms of temporal pattern separation (crosses and bars: mean  $\pm$  SEM; solid lines: linear  
 139 regression on data points). Although model 1 and 2 do not reproduce well the pattern separation levels  
 140 observed in real GCs and CA3 PCs (Figure 5E), they qualitatively go in the same direction: the GC-to-  
 141 CA3 inspired model 2 produces visually lower  $R_{output}$  than the PP-GC inspired model 1, at short  
 142 timescales (10 ms) and large ones (250 ms, for low  $R_{input}$  values). Overall, this analysis shows that  
 143 differences in terms of synaptic dynamics are sufficient to cause differences in terms of temporal pattern  
 144 separation.

145 **Table S1-3. Linear regressions goodness-of-fit, p-value and slope.** The predictor variables (x-axis)  
146 correspond to columns, and the variables to be explained (y-axis) correspond to rows. Red highlights  
147 significant regressions that explain more than 50% of the variance ( $R^2 > 50\%$ ). Blue highlights  
148 regressions that are significant ( $p < 0.01$ ) but that explain less than 50% of the variance. The values used  
149 for Normalized Decorrelation, i.e.  $(R_{\text{input}} - R_{\text{output}}) / R_{\text{input}}$ , and for Spiketrain Reliability ( $R_w$ ) were  
150 computed with a binning window of 10 ms, unless specified. Abbreviations: GC yo = from young mice,  
151 GC ad = from adult mice, ALL = dataset pooling all celltypes and conditions recorded in young mice  
152  
153

**Table S1. Intrinsic electrophysiological cell properties**

|                                                       |                     | x-axis → |                                                                      |                                                                        |                                                                      |                                                                       |
|-------------------------------------------------------|---------------------|----------|----------------------------------------------------------------------|------------------------------------------------------------------------|----------------------------------------------------------------------|-----------------------------------------------------------------------|
|                                                       |                     | y-axis ↓ | Membrane<br>Capacitance<br>(Cm)                                      | Membrane<br>Resistance<br>(Rm)                                         | Membrane<br>Time<br>Constant =<br>Rm.Cm                              | Resting<br>Membrane<br>Potential (Vrest)                              |
| <b>Normalized<br/>Decorrelation</b>                   | <b>GC<br/>yo</b>    |          | R <sup>2</sup> = 4%<br>p = 0.08<br>slope = -0.2<br>F(1,100) = 3.2    | R <sup>2</sup> = 5%<br>p = 0.06<br>slope = -0.03<br>F(1,100) = 3.7     | R <sup>2</sup> = 8%<br>p = 0.013<br>slope = -1.2<br>F(1,100) = 6.5   | R <sup>2</sup> = 3%<br>p = 0.17<br>slope = -0.2<br>F(1,100) = 1.9     |
|                                                       | <b>FS</b>           |          | R <sup>2</sup> = 47%<br>p = 0.0008<br>slope = -1.5<br>F(1,18) = 15.8 | R <sup>2</sup> = 77%<br>p < 0.0001<br>slope = 0.6<br>F(1,18) = 58.9    | R <sup>2</sup> = 5%<br>p = 0.4<br>slope = 13.6<br>F(1,18) = 1.2      | R <sup>2</sup> = 46%<br>p = 0.0009<br>slope = 1.4<br>F(1,18) = 15.6   |
|                                                       | <b>HMC</b>          |          | R <sup>2</sup> = 33%<br>p = 0.013<br>slope = -0.4<br>F(1,16) = 7.8   | R <sup>2</sup> = 3%<br>p = 0.48<br>slope = 0.06<br>F(1,16) = 0.5       | R <sup>2</sup> = 7%<br>p = 0.3<br>slope = -1.8<br>F(1,16) = 1.6      | R <sup>2</sup> = 0.5%<br>p = 0.8<br>slope = 0.1<br>F(1,16) = 0.08     |
|                                                       | <b>CA3<br/>+gzn</b> |          | R <sup>2</sup> = 0.1%<br>p = 0.9<br>slope = -0.05<br>F(1,13) = 0.01  | R <sup>2</sup> = 2%<br>p = 0.59<br>slope = 0.03<br>F(1,13) = 0.3       | R <sup>2</sup> = 4%<br>p = 0.60<br>slope = 1.2<br>F(1,13) = 0.6      | R <sup>2</sup> = 29%<br>p = 0.04<br>slope = 0.7<br>F(1,13) = 5.4      |
|                                                       | <b>GC<br/>+gzn</b>  |          | R <sup>2</sup> = 30%<br>p = 0.008<br>slope = 1.6<br>F(1,20) = 8.6    | R <sup>2</sup> = 0.3%<br>p = 0.8<br>slope = 0.01<br>F(1,20) = 0.06     | R <sup>2</sup> = 2%<br>p = 0.5<br>slope = 3.5<br>F(1,20) = 4.1       | R <sup>2</sup> = 13%<br>p = 0.09<br>slope = -0.7<br>F(1,20) = 3.1     |
|                                                       | <b>ALL</b>          |          | R <sup>2</sup> = 0.6%<br>p = 0.35<br>slope = -0.09<br>F(1,175) = 0.9 | R <sup>2</sup> = 3%<br>p = 0.04<br>slope = 0.03<br>F(1,175) = 4.2      | R <sup>2</sup> = 1%<br>p = 0.2<br>slope = 0.55<br>F(1,175) = 1.5     | R <sup>2</sup> = 0.2%<br>p = 0.55<br>slope = -0.08<br>F(1,175) = 0.3  |
|                                                       | <b>GC<br/>ad</b>    |          | R <sup>2</sup> = 4%<br>p = 0.24<br>slope = -0.4<br>F(1,33) = 1.4     | R <sup>2</sup> = 11%<br>p = 0.06<br>slope = -0.07<br>F(1,33) = 3.9     | R <sup>2</sup> = 17%<br>p = 0.015<br>slope = -4.3<br>F(1,33) = 6.6   | R <sup>2</sup> = 5%<br>p = 0.2<br>slope = -0.3<br>F(1,33) = 1.7       |
| <b>Spiketrain<br/>Reliability<br/>(R<sub>w</sub>)</b> | <b>GC<br/>yo</b>    |          | R <sup>2</sup> = 2%<br>p = 0.2<br>slope = 0.001<br>F(1,100) = 1.8    | R <sup>2</sup> = 6%<br>p = 0.03<br>slope = 4e-3<br>F(1,100) = 4.7      | R <sup>2</sup> = 7%<br>p = 0.02<br>slope = 0.01<br>F(1,100) = 6.1    | R <sup>2</sup> = 3%<br>p = 0.17<br>slope = 0.002<br>F(1,100) = 1.9    |
|                                                       | <b>FS</b>           |          | R <sup>2</sup> = 48%<br>p = 0.0006, slope = 0.01<br>F(1,18) = 16.8   | R <sup>2</sup> = 70%<br>p < 0.0001<br>slope = -0.007<br>F(1,18) = 41.7 | R <sup>2</sup> = 6%<br>p = 0.29<br>slope = -0.12<br>F(1,18) = 0.7    | R <sup>2</sup> = 39%<br>p = 0.003<br>slope = -0.014<br>F(1,18) = 11.6 |
|                                                       | <b>HMC</b>          |          | R <sup>2</sup> = 29%<br>p = 0.19<br>slope = 0.005<br>F(1,16) = 6.5   | R <sup>2</sup> = 24%<br>p = 0.06<br>slope = -0.001<br>F(1,16) = 5.0    | R <sup>2</sup> = 9%<br>p = 0.2<br>slope = 0.006<br>F(1,16) = 0.3     | R <sup>2</sup> = 3%<br>p = 0.5<br>slope = -0.002<br>F(1,16) = 0.5     |
|                                                       | <b>CA3<br/>+gzn</b> |          | R <sup>2</sup> = 4%<br>p = 0.5<br>slope = 0.003<br>F(1,13) = 0.5     | R <sup>2</sup> = 9%<br>p = 0.29<br>slope = 6e-4<br>F(1,13) = 1.2       | R <sup>2</sup> = 4%<br>p = 0.45<br>slope = -0.01<br>F(1,13) = 0.45   | R <sup>2</sup> = 10%<br>p = 0.24<br>slope = -0.004<br>F(1,13) = 1.5   |
|                                                       | <b>GC<br/>+gzn</b>  |          | R <sup>2</sup> = 2%<br>p = 0.5<br>slope = -0.003<br>F(1,20) = 0.4    | R <sup>2</sup> = 22%<br>p = 0.03<br>slope = 8e-4<br>F(1,20) = 5.7      | R <sup>2</sup> = 17%<br>p = 0.05<br>slope = -0.02<br>F(1,20) = 3.9   | R <sup>2</sup> = 29%<br>p = 0.01<br>slope = 0.008<br>F(1,20) = 8.0    |
|                                                       | <b>ALL</b>          |          | R <sup>2</sup> = 0.4%<br>p = 0.5<br>slope = 7e-4<br>F(1,175) = 0.5   | R <sup>2</sup> = 7%<br>p = 0.0013<br>slope = -4e-4<br>F(1,175) = 10.7  | R <sup>2</sup> = 3%<br>p = 0.045<br>slope = -0.008<br>F(1,175) = 4.1 | R <sup>2</sup> = 1%<br>p = 0.24<br>slope = 0.001<br>F(1,175) = 1.4    |
|                                                       | <b>GC<br/>ad</b>    |          | R <sup>2</sup> = 13%<br>p = 0.03<br>slope = 0.006<br>F(1,33) = 4.9   | R <sup>2</sup> = 6%<br>p = 0.17<br>slope = 4e-4<br>F(1,33) = 2.0       | R <sup>2</sup> = 24%<br>p = 0.003<br>slope = 0.04<br>F(1,33) = 10.3  | R <sup>2</sup> = 8.5%<br>p = 0.09<br>slope = 0.004<br>F(1,33) = 3.05  |

157  
158

Table S2. Spike-wise neural noise

| y-axis ↓                                 |                 | x-axis →                                                                |                                                                         |                                                                         |
|------------------------------------------|-----------------|-------------------------------------------------------------------------|-------------------------------------------------------------------------|-------------------------------------------------------------------------|
|                                          |                 | Delay                                                                   | Jitter                                                                  | Spike Probability (SP)                                                  |
| Normalized Decorrelation                 | GC yo           | R <sup>2</sup> = 20%<br>p < 0.0001<br>slope = 1.1<br>F(1,100) = 24.5    | R <sup>2</sup> = 31%<br>p < 0.0001<br>slope = 1.05<br>F(1,100) = 45.1   | R <sup>2</sup> = 41%<br>p < 0.0001<br>slope = -37.6<br>F(1,100) = 69.8  |
|                                          | FS              | R <sup>2</sup> = 11%<br>p = 0.15<br>slope = 2.3<br>F(1,18) = 2.2        | R <sup>2</sup> = 18%<br>p = 0.06<br>slope = 9.6<br>F(1,18) = 3.9        | R <sup>2</sup> = 88%<br>p < 0.0001<br>slope = -49.1<br>F(1,18) = 129.8  |
|                                          | HMC             | R <sup>2</sup> = 9%<br>p = 0.22<br>slope = 2.1<br>F(1,16) = 1.6         | R <sup>2</sup> = 18%<br>p = 0.08<br>slope = 3.4<br>F(1,16) = 3.5        | R <sup>2</sup> = 34%<br>p = 0.011<br>slope = -42.0<br>F(1,16) = 8.1     |
|                                          | ALL             | R <sup>2</sup> = 35%<br>p < 0.0001<br>slope = 1.9<br>F(1,175) = 74.3    | R <sup>2</sup> = 23%<br>p < 0.0001<br>slope = 1.4<br>F(1,175) = 41.0    | R <sup>2</sup> = 57%<br>p < 0.0001<br>slope = -50.6<br>F(1,175) = 183.8 |
|                                          | GC ad           | R <sup>2</sup> = 2%<br>p = 0.38<br>slope = 0.9<br>F(1,33) = 0.8         | R <sup>2</sup> = 4%<br>p = 0.23<br>slope = -3.5<br>F(1,33) = 1.4        | R <sup>2</sup> = 42%<br>p < 0.0001<br>slope = -45.7<br>F(1,33) = 23.8   |
|                                          | Shuffle (GC yo) | R <sup>2</sup> = 5%<br>p = 0.02<br>slope = 0.6<br>F(1,100) = 5.8        | R <sup>2</sup> = 20%<br>p < 0.0001<br>slope = 0.8<br>F(1,100) = 25.6    | R <sup>2</sup> = 61%<br>p < 0.0001<br>slope = -36.5<br>F(1,100) = 160.0 |
| Spiketrain Reliability (R <sub>w</sub> ) | GC yo           | R <sup>2</sup> = 23%<br>p < 0.0001<br>slope = -0.012<br>F(1,100) = 29.9 | R <sup>2</sup> = 37%<br>p < 0.0001<br>slope = -0.012<br>F(1,100) = 58.9 | R <sup>2</sup> = 48%<br>p < 0.0001<br>slope = 0.42<br>94.1              |
|                                          | FS              | R <sup>2</sup> = 10%<br>p = 0.16<br>slope = -0.025<br>F(1,18) = 2.1     | R <sup>2</sup> = 11%<br>p = 0.15<br>slope = -0.084<br>F(1,18) = 2.2     | R <sup>2</sup> = 87%<br>p < 0.0001<br>slope = 0.55<br>F(1,18) = 117.7   |
|                                          | HMC             | R <sup>2</sup> = 36%<br>p = 0.009<br>slope = -0.030<br>F(1,16) = 8.8    | R <sup>2</sup> = 53%<br>p = 0.0007<br>slope = -0.043<br>F(1,16) = 17.7  | R <sup>2</sup> = 31%<br>p = 0.016<br>slope = 0.30<br>F(1,16) = 7.3      |
|                                          | ALL             | R <sup>2</sup> = 40%<br>p < 0.0001<br>slope = -0.020<br>F(1,175) = 93.4 | R <sup>2</sup> = 28%<br>p < 0.0001<br>slope = -0.016<br>F(1,175) = 53.4 | R <sup>2</sup> = 61%<br>p < 0.0001<br>slope = 0.5<br>F(1,175) = 219.1   |
|                                          | GC ad           | R <sup>2</sup> = 7%<br>p = 0.14<br>slope = -0.01<br>F(1,33) = 2.3       | R <sup>2</sup> = 0.03%<br>p = 0.9<br>slope = 0.003<br>F(1,33) = 0.01    | R <sup>2</sup> = 16%<br>p = 0.017<br>slope = 0.2<br>F(1,33) = 6.3       |
|                                          | Shuffle (GC yo) | R <sup>2</sup> = 5%<br>p = 0.03<br>slope = -0.006<br>F(1,100) = 5.0     | R <sup>2</sup> = 21%<br>p < 0.0001<br>slope = -0.008<br>F(1,100) = 26.2 | R <sup>2</sup> = 62%<br>p < 0.0001<br>slope = 0.4<br>F(1,100) = 162     |

159  
160

161  
162

**Table S3. Spiketrain-wise properties**

|                                 |                 | Overall Firing Rate                                                 | Spiketrain Reliability ( $R_w$ )                                  |
|---------------------------------|-----------------|---------------------------------------------------------------------|-------------------------------------------------------------------|
| <b>Normalized Decorrelation</b> | <b>GC yo</b>    | $R^2 = 15\%$<br>$p < 0.0001$<br>slope = - 1.3<br>$F(1,100) = 18.4$  | $R^2 = 81\%$<br>$p < 0.0001$<br>slope = -87<br>$F(1,100) = 430.1$ |
|                                 | <b>FS</b>       | $R^2 = 65\%$<br>$p < 0.0001$<br>slope = - 0.5<br>$F(1,18) = 33.5$   | $R^2 = 90\%$<br>$p < 0.0001$<br>slope = -85<br>$F(1,18) = 169.0$  |
|                                 | <b>HMC</b>      | $R^2 = 35\%$<br>$p = 0.0010$<br>slope = - 2.8<br>$F(1,16) = 8.6$    | $R^2 = 61\%$<br>$p = 0.0001$<br>slope = -105<br>$F(1,16) = 25.5$  |
|                                 | <b>CA3 +gzn</b> | $R^2 = 69\%$<br>$p = 0.0001$<br>slope = - 1.7<br>$F(1,13) = 28.7$   | $R^2 = 55\%$<br>$p = 0.0016$<br>slope = -76<br>$F(1,13) = 15.8$   |
|                                 | <b>GC +gzn</b>  | $R^2 = 0.6\%$<br>$p = 0.73$<br>slope = - 0.2<br>$F(1,20) = 0.1$     | $R^2 = 28\%$<br>$p = 0.0111$<br>slope = -75<br>$F(1,20) = 7.8$    |
|                                 | <b>ALL</b>      | $R^2 = 37\%$<br>$p < 0.0001$<br>slope = - 0.8<br>$F(1,175) = 101.5$ | $R^2 = 79\%$<br>$p < 0.0001$<br>slope = -91<br>$F(1,175) = 673.1$ |
|                                 | <b>GC ad</b>    | $R^2 = 30\%$<br>$p = 0.0006$<br>slope = - 4.1<br>$F(1,33) = 14.5$   | $R^2 = 52\%$<br>$p < 0.0001$<br>slope = -90<br>$F(1,33) = 36.2$   |

**Table S4. Statistics**

| <b>Figure</b> | <b>Test</b>                               | <b>N</b>                                                  |                                                 | <b>Descriptive stats</b> | <b>p-value</b>                                                                                                                           | <b>Degrees of freedom &amp; F/t/z/R/etc value</b>                                                                                                                                  | <b>other</b>                                                                                  |
|---------------|-------------------------------------------|-----------------------------------------------------------|-------------------------------------------------|--------------------------|------------------------------------------------------------------------------------------------------------------------------------------|------------------------------------------------------------------------------------------------------------------------------------------------------------------------------------|-----------------------------------------------------------------------------------------------|
| 2d            | One-sample T-test                         | 8<br>8<br>13<br>13<br>10<br>13<br>11<br>11<br>8<br>4<br>3 | recorded neurons                                | mean +/- SEM.            | < 0.0001<br>< 0.0001<br>< 0.0001<br>< 0.0001<br>< 0.0001<br>< 0.0001<br>< 0.0001<br>< 0.0001<br>< 0.0001<br>< 0.0001<br>0.0002<br>0.0093 | t(7) = 21.81<br>t(7) = 12.81<br>t(12) = 22.70<br>t(12) = 24.49<br>t(9) = 19.91<br>t(12) = 33.62<br>t(10) = 41.62<br>t(10) = 24.15<br>t(7) = 20.56<br>t(3) = 22.28<br>t(2) = 10.325 | Rinput =<br>1<br>0.95<br>0.88<br>0.84<br>0.76<br>0.74<br>0.65<br>0.56<br>0.47<br>0.26<br>0.11 |
| 2d            | Unbalanced one-way ANOVA                  | 8, 8,<br>13, 13,<br>10, 13,<br>11, 11,<br>8, 4, 3         | 11 groups of 102 recording sets from 28 neurons | mean +/- SEM             | < 0.0001                                                                                                                                 | F(10,91) = 30.05                                                                                                                                                                   |                                                                                               |
| 2d            | Post-hoc Tukey-Kramer Multiple-comparison | 8, 8,<br>13, 13,<br>10, 13,<br>11, 11,<br>8, 4, 3         | recorded neurons                                | mean +/- SEM             | see Fig2d right                                                                                                                          |                                                                                                                                                                                    |                                                                                               |
| 2e            | unbalanced                                | 8, 8,                                                     | 11 groups                                       | mean +/- SEM             | 0.19                                                                                                                                     | F(10,91) = 1.42                                                                                                                                                                    |                                                                                               |



|     |                                                                               |                                           |                                   |                                                                                                                                                                      |                                                |                                                                                   |                                                           |
|-----|-------------------------------------------------------------------------------|-------------------------------------------|-----------------------------------|----------------------------------------------------------------------------------------------------------------------------------------------------------------------|------------------------------------------------|-----------------------------------------------------------------------------------|-----------------------------------------------------------|
|     | one-way ANOVA                                                                 | 13, 13, 10, 13, 11, 11, 8, 4, 3           | of 102 recording sets (see above) |                                                                                                                                                                      |                                                |                                                                                   |                                                           |
| 3A4 | ANCOVA                                                                        | 20, 61                                    | recording sets (FS, GC)           | Linear best fit, 95% CI                                                                                                                                              | < 0.0001                                       | F(2,77) = 38.70                                                                   |                                                           |
| 3A4 | Unbalanced two-way ANOVA                                                      | 20, 61                                    | recording sets (FS, GC)           |                                                                                                                                                                      | 0.016<br>< 0.0001<br>0.72                      | F(4,71) = 4.86<br>F(1,71) = 69.65<br>F(4,71) = 0.52                               | Input groups<br>Cell types<br>Interaction                 |
| 3A4 | Post-hoc two-sample T-test with Bonferroni correction for 5 comparison groups | 4, 13<br>4, 13<br>4, 13<br>4, 11<br>4, 11 | Recorded neurons (FS, GC)         | $R_{\text{output}}$<br>Mean +/- SEM<br><br>0.26±0.05   0.12±0.02<br>0.34±0.04   0.17±0.02<br>0.40±0.04   0.18±0.02<br>0.42±0.04   0.21±0.02<br>0.45±0.04   0.23±0.02 | 0.0122<br>0.0001<br>0.0007<br>0.0181<br>0.0307 | t(15) = -3.19<br>t(15) = -3.44<br>t(15) = -5.10<br>t(13) = -6.48<br>t(13) = -3.75 | $R_{\text{input}} = 0.88$<br>0.84<br>0.74<br>0.65<br>0.56 |

|     |                                                                                                                        |                       |                                  |                                                                                                          |                                                |                                                                                   |                                                           |
|-----|------------------------------------------------------------------------------------------------------------------------|-----------------------|----------------------------------|----------------------------------------------------------------------------------------------------------|------------------------------------------------|-----------------------------------------------------------------------------------|-----------------------------------------------------------|
| 3A4 | one-sample<br>T-test on<br>difference<br>between<br>$R_{\text{output}}$ of<br>simultaneou<br>sly recorded<br>GC and FS | 3<br>3<br>3<br>3<br>3 | Pairs of<br>recorded<br>neurons  | Mean +/- SEM<br>-0.4038 ± 0.02<br>-0.3443 ± 0.03<br>-0.3266 ± 0.03<br>-0.1683 ± 0.002<br>-0.2397 ± 0.007 | 0.0024<br>0.0079<br>0.0061<br>0.0002<br>0.0008 | t(2) = -20.23<br>t(2) = -11.18<br>t(2) = -12.74<br>t(2) = -78.87<br>t(2) = -35.94 | $R_{\text{input}} = 0.88$<br>0.84<br>0.74<br>0.65<br>0.56 |
| 3B3 | ANCOVA                                                                                                                 | 18, 22                | recording<br>sets (HMC,<br>GC)   | Linear best fit, 95% CI                                                                                  | 0.15                                           | F(2,36) = 1.97                                                                    |                                                           |
| 3B3 | Unbalanced<br>two-way<br>ANOVA                                                                                         | 18, 22                | recording<br>sets (HMC,<br>GC)   |                                                                                                          | 0.0004<br>0.074<br>0.57                        | F(2, 34) = 9.76<br>F(1, 34) = 3.39<br>F(2, 34) = 0.58                             | Input groups<br>Cell types<br>Interaction                 |
| 3B3 | Post-hoc<br>two-sample<br>T-test with<br>Bonferroni<br>correction<br>for 3<br>comparison<br>groups                     | 10, 7<br>8, 5<br>4, 6 | Recorded<br>neurons<br>(HMC, GC) |                                                                                                          | 1<br>0.05<br>0.21                              | t(15) = -0.24<br>t(11) = -2.81<br>t(8) = -2.09                                    | $R_{\text{input}} = 0.76$<br>0.26<br>0.11                 |

|    |                                                                               |                |                                                        |                         |                                          |                                                                        |                                               |
|----|-------------------------------------------------------------------------------|----------------|--------------------------------------------------------|-------------------------|------------------------------------------|------------------------------------------------------------------------|-----------------------------------------------|
| 4D | ANCOVA                                                                        | 15, 22         | recording sets (CA3, GC)                               | Linear best fit, 95% CI | 0.0083                                   | F(2,33) = 5.49                                                         |                                               |
| 4D | Unbalanced two-way ANOVA                                                      | 15, 22         | recording sets (CA3, GC)                               |                         | <0.0001<br>0.0036<br>0.24                | F(1, 33) = 118.21<br>F(1, 33) = 9.82<br>F(1, 33) = 1.45                | Input groups<br>Cell types<br>Interaction     |
| 4D | Post-hoc two-sample T-test with Bonferroni correction for 2 comparison groups | 6, 11<br>9, 11 | Recorded neurons (CA3, GC)                             |                         | 0.032<br>0.1                             | t(15) = 2.14<br>t(18) = 2.65                                           | R <sub>input</sub> = 0.76<br>0.11             |
| 5C | ANCOVA                                                                        | 200,<br>610    | Recordings for all pairs of input spiketrains (FS, GC) | Linear best fit         | <0.0001<br><0.0001<br><0.0001<br><0.0001 | F(2,806)=364.8<br>F(2,806)=59.32<br>F(2,806)=66.36<br>F(2,806) = 56.70 | Timescale =<br>10ms<br>50ms<br>100ms<br>250ms |

|         |                      |                                                           |                                                                                |                    |                                                                                                                          |                                                                                                                                                                               |                                                                                               |
|---------|----------------------|-----------------------------------------------------------|--------------------------------------------------------------------------------|--------------------|--------------------------------------------------------------------------------------------------------------------------|-------------------------------------------------------------------------------------------------------------------------------------------------------------------------------|-----------------------------------------------------------------------------------------------|
| 5D      | ANCOVA               | 180,<br>220                                               | Recordings<br>for all pairs<br>of input<br>spiketrains<br>(HMC, GC)            | Linear best fit    | <0.0001<br><0.0001<br><0.0001<br><0.0001                                                                                 | F(2,396)=15.10<br>F(2,396)=21.34<br>F(2,396)=19.33<br>F(2,396) = 24.30                                                                                                        | Timescale =<br>10ms<br>50ms<br>100ms<br>250ms                                                 |
| 5E      | ANCOVA               | 150,<br>220                                               | Recordings<br>for all pairs<br>of input<br>spiketrains<br>(CA3+gzn,<br>GC+gzn) | Linear best fit    | <0.0001<br><0.0001<br><0.0001<br><0.0001                                                                                 | F(2,366)=33.47<br>F(2,366)=17.52<br>F(2,366)=34.20<br>F(2,366) = 108.9                                                                                                        | Timescale =<br>10ms<br>50ms<br>100ms<br>250ms                                                 |
| 6B      | One-sample<br>T-test | 8<br>8<br>13<br>13<br>10<br>13<br>11<br>11<br>8<br>4<br>3 | recorded<br>neurons                                                            | parabolic best fit | < 0.0001<br>0.0001<br>< 0.0001<br>< 0.0001<br>< 0.0001<br>< 0.0001<br>< 0.0001<br>< 0.0001<br>0.0001<br>0.0042<br>0.1125 | t(7) = 11.23<br>t(7) = 7.43<br>t(12) = 12.63<br>t(12) = 16.615<br>t(9) = 8.57<br>t(12) = 17.59<br>t(10) = 13.65<br>t(10) = 17.72<br>t(7) = 8.15<br>t(3) = 7.91<br>t(2) = 2.72 | Rinput =<br>1<br>0.95<br>0.88<br>0.84<br>0.76<br>0.74<br>0.65<br>0.56<br>0.47<br>0.26<br>0.11 |
| 6C left | ANCOVA               | 102,<br>102                                               | Recordings                                                                     | mean +/- SEM       | 0.33                                                                                                                     | F(2,200) = 1.09                                                                                                                                                               |                                                                                               |

|              |                                                                                       |                                                                                 |                                   |              |                                                                                      |                                                                                                                                                                                 |                                                                                               |
|--------------|---------------------------------------------------------------------------------------|---------------------------------------------------------------------------------|-----------------------------------|--------------|--------------------------------------------------------------------------------------|---------------------------------------------------------------------------------------------------------------------------------------------------------------------------------|-----------------------------------------------------------------------------------------------|
| 6C<br>right  | one-sample<br>T-test                                                                  | 8<br>8<br>13<br>13<br>10<br>13<br>11<br>11<br>8<br>4<br>3                       | recording<br>sets                 | mean +/- SEM | 0.63<br>0.09<br>0.03<br>0.06<br>0.96<br>0.06<br>0.73<br>0.46<br>0.77<br>0.85<br>0.60 | t(7) = -0.51<br>t(7) = -1.99<br>t(12) = -2.47<br>t(12) = -2.06<br>t(9) = -0.05<br>t(12) = -2.07<br>t(10) = 0.36<br>t(10) = -0.77<br>t(7) = -0.30<br>t(3) = -0.21<br>t(2) = -0.6 | Rinput =<br>1<br>0.95<br>0.88<br>0.84<br>0.76<br>0.74<br>0.65<br>0.56<br>0.47<br>0.26<br>0.11 |
| 7E<br>bottom | Monte-Carlo<br>exact test<br>(based on<br>proportion<br>of data<br>points above<br>0) | 800<br>800<br>1300<br>1300<br>1000<br>1300<br>1100<br>1100<br>800<br>400<br>300 | GC - Shuffle<br>recording<br>sets |              | 0<br>0<br>0<br>0<br>0.055<br>0<br>0.0009<br>0.0845<br>0.0088<br>0.26<br>0.5867       |                                                                                                                                                                                 | Rinput =<br>1<br>0.95<br>0.88<br>0.84<br>0.76<br>0.74<br>0.65<br>0.56<br>0.47<br>0.26<br>0.11 |

|              |                                                                              |                                  |                                                         |                            |          |                   |               |
|--------------|------------------------------------------------------------------------------|----------------------------------|---------------------------------------------------------|----------------------------|----------|-------------------|---------------|
| 7E<br>bottom | Monte-Carlo<br>exact test<br>(based on<br>proportion<br>of means<br>above 0) | 100                              | GC means -<br>Shuffle<br>means                          | Mean +/- 95% CI            | 0        |                   | Rinput =<br>1 |
|              |                                                                              | 100                              |                                                         |                            | 0        |                   | 0.95          |
|              |                                                                              | 100                              |                                                         |                            | 0        |                   | 0.88          |
|              |                                                                              | 100                              |                                                         |                            | 0        |                   | 0.84          |
|              |                                                                              | 100                              |                                                         |                            | 0        |                   | 0.76          |
|              |                                                                              | 100                              |                                                         |                            | 0        |                   | 0.74          |
|              |                                                                              | 100                              |                                                         |                            | 0        |                   | 0.65          |
|              |                                                                              | 100                              |                                                         |                            | 0        |                   | 0.56          |
|              |                                                                              | 100                              |                                                         |                            | 0        |                   | 0.47          |
|              |                                                                              | 100                              |                                                         |                            | 0.01     |                   | 0.26          |
| 100          | 0.85                                                                         | 0.11                             |                                                         |                            |          |                   |               |
| 8A           | Linear<br>regression<br>F-test                                               | 102+2<br>0+18+<br>15+22<br>= 177 | Recording<br>sets<br>(GC,FS,HMC<br>,CA3+gzn,G<br>C+gzn) | R <sup>2</sup> = 79.4%     | < 0.0001 | F(1, 175) = 673.1 |               |
| 8D           | One-sample<br>T-test                                                         | 8                                | Recording<br>sets                                       | PSTH Rout means +/-<br>SEM | 0.0013   | t(7) = 5.17       | Rinput =<br>1 |
|              |                                                                              | 8                                |                                                         |                            | 0.0125   | t(7) = 3.335      | 0.95          |
|              |                                                                              | 13                               |                                                         |                            | < 0.0001 | t(12) = 6.85      | 0.88          |
|              |                                                                              | 13                               |                                                         |                            | < 0.0001 | t(12) = 7.65      | 0.84          |
|              |                                                                              | 10                               |                                                         |                            | 0.0006   | t(9) = 5.12       | 0.76          |
|              |                                                                              | 13                               |                                                         |                            | < 0.0001 | t(12) = 9.05      | 0.74          |
|              |                                                                              | 11                               |                                                         |                            | < 0.0001 | t(10) = 8.08      | 0.65          |
|              |                                                                              | 11                               |                                                         |                            | < 0.0001 | t(10) = 8.32      | 0.56          |
|              |                                                                              | 8                                |                                                         |                            | 0.0002   | t(7) = 7.05       | 0.47          |
|              |                                                                              | 4                                |                                                         |                            | 0.0107   | t(3) = 5.69       | 0.26          |
| 3            | 0.0905                                                                       | t(2) = 3.095                     | 0.11                                                    |                            |          |                   |               |

|           |                                         |          |                                 |                                       |                               |                                         |                       |
|-----------|-----------------------------------------|----------|---------------------------------|---------------------------------------|-------------------------------|-----------------------------------------|-----------------------|
| S3A       | Linear regression F-test                | 102      | recording sets                  | R <sup>2</sup> :<br>20%<br>31%<br>41% | <0.0001<br><0.0001<br><0.0001 | F(1,100) =<br>24.5<br>45.1<br>69.8      | Delay<br>Jitter<br>SP |
| S3B       | Linear regression F-test                | 102      | recording sets                  | R <sup>2</sup> :<br>5%<br>20%<br>61%  | 0.02<br><0.0001<br>< 0.0001   | F(1,100) =<br>5.8<br>25.6<br>160.0      | Delay<br>Jitter<br>SP |
| S3C       | Linear regression F-test                | 20       | recording sets                  | R <sup>2</sup> :<br>11%<br>18%<br>88% | 0.15<br>0.06<br><0.0001       | F(1,18) =<br>2.2<br>3.9<br>129.8        | Delay<br>Jitter<br>SP |
| S3D       | Linear regression F-test                | 177      | recording sets                  | R <sup>2</sup> :<br>35%<br>23%<br>57% | <0.0001<br><0.0001<br><0.0001 | F(1,175) =<br>74.3<br>41.0<br>183.8     | Delay<br>Jitter<br>SP |
| S4 top    | Wilcoxon rank sum test                  | 20, 61   | Recording sets (FS, GC)         | Mean +/- SEM                          | < 0.0001<br><0.0001<br>0.0004 | Z = 6.1716<br>Z= 5.6787<br>Z = -3.5212  | Delay<br>Jitter<br>SP |
| S4 bottom | Wilcoxon rank sum test                  | 18,22    | Recording sets (HMC, GC)        | Mean +/- SEM                          | 0.5773<br>0.0267<br>0.0795    | Z = 0.5573<br>Z= -2.2157<br>Z = -1.7535 | Delay<br>Jitter<br>SP |
| S5A       | ANCOVA                                  | 110, 102 | recording sets (Simulation, GC) | Linear best fit                       | < 0.0001                      | F(2,208) = 92.7                         |                       |
| S5B       | Two-sample T-test corrected for samples | 110, 102 | recording sets (Simulation, GC) |                                       | < 0.0001                      | T(104) = 15.18                          |                       |

|           |                                  |        |                          |              |          |               |  |
|-----------|----------------------------------|--------|--------------------------|--------------|----------|---------------|--|
|           | with unequal variances           |        |                          |              |          |               |  |
| S6(FS)    | Two sample T-test                | 20, 61 | recording sets (FS, GC)  | Mean +/- SEM | < 0.0001 | T(79) = -8.81 |  |
| S6 (HMC)  | Two sample T-test                | 18, 22 | recording sets (HMC, GC) | Mean +/- SEM | 0.0963   | T(38) = -1.70 |  |
| S6 (CA3)  | Two sample T-test                | 15, 22 | recording sets (FS, GC)  | Mean +/- SEM | 0.0052   | T(35) = 2.98  |  |
| S7A (FS)  | Wilcoxon rank sum test           | 20, 61 | recording sets (FS, GC)  | Mean +/- SEM | < 0.0001 | Z = -4.2550   |  |
| S7C (FS)  | One-sided Wilcoxon rank sum test | 20, 61 | recording sets (FS, GC)  | Mean +/- SEM | < 0.0001 | Z = -4.7815   |  |
| S7A (HMC) | Wilcoxon rank sum test           | 18, 22 | recording sets (HMC, GC) | Mean +/- SEM | 0.0005   | Z = -3.4663   |  |
| S7C (HMC) | One-sided Wilcoxon rank sum test | 18, 22 | recording sets (HMC, GC) | Mean +/- SEM | < 0.0001 | Z = -4.9732   |  |
| S7A (CA3) | Wilcoxon rank sum test           | 15, 22 | recording sets (HMC, GC) | Mean +/- SEM | 0.18     | Z = 1.3456    |  |



|              |                                           |             |                                                                           |                 |                                         |                                                                  |                                               |
|--------------|-------------------------------------------|-------------|---------------------------------------------------------------------------|-----------------|-----------------------------------------|------------------------------------------------------------------|-----------------------------------------------|
| S7C<br>(CA3) | One-sided<br>Wilcoxon<br>rank sum<br>test | 15, 22      | recording<br>sets (HMC,<br>GC)                                            | Mean +/- SEM    | 0.74                                    | Z = 0.6499                                                       |                                               |
| S8D          | ANCOVA                                    | 20, 61      | Recording<br>sets (nbFS,<br>GC)                                           | Linear best fit | <0.0001                                 | F(2,77)=30.1                                                     |                                               |
| S8D          | Unbalanced<br>two-way<br>ANOVA            | 20, 61      | recording<br>sets (nbFS,<br>GC )                                          |                 | 0.002<br><0.0001<br>0.84                | F(4, 71) = 4.7<br>F(1, 71) = 55.0<br>F(4, 71) = 0.35             | Input groups<br>Cell types<br>Interaction     |
| S8F          | ANCOVA                                    | 180,<br>220 | Recordings<br>for all pairs<br>of input<br>spike trains<br>(nbHMC,<br>GC) | Linear best fit | 0.0001<br><0.0001<br><0.0001<br><0.0001 | F(2,396)=9.4<br>F(2,396)=18.2<br>F(2,396)=9.7<br>F(2,396) = 21.8 | Timescale =<br>10ms<br>50ms<br>100ms<br>250ms |
